# Supplementary material
Source: PubMed Central journal article supplement (PMC3328181)
Supplement: supp_dev.075796_DEV075796TableS1.pdf [file supp_dev.075796_DEV075796TableS1.pdf]

**Table S1. qRT-PCR primers used in this study**

| Gene          | Primer    | Sequence (5' to 3')           |
|---------------|-----------|-------------------------------|
| <i>Fgf10</i>  | Sense     | AAGAATGAAGACTGTCCGTACAGTGTC   |
|               | Antisense | GCTTACAGTCGTTGTAAACTCTTTTGAGC |
| <i>Fgf17</i>  | Sense     | AGAGGATGGCAACAAGTTCGCCAAG     |
|               | Antisense | AGTCTTTGCTCTTCCCGCTCGGCTTG    |
| <i>Raldh3</i> | Sense     | AGCCTCTCTCATCAAAGAGGTCGG      |
|               | Antisense | CTCTGACCAGCTTTCCAACCTCTG      |
| E-cadherin    | Sense     | TCATGGATCAGAAGATCACGTATC      |
|               | Antisense | AGTGGCAATGGGTGAACCATCATC      |

The primer sequences for *Axin2*, *Msx1*, *Msx2*, *Fgf8* and *Gapdh* were described previously (Jin et al., 2011).
