# Supplementary material
Source: PubMed Central journal article supplement (PMC3328181)

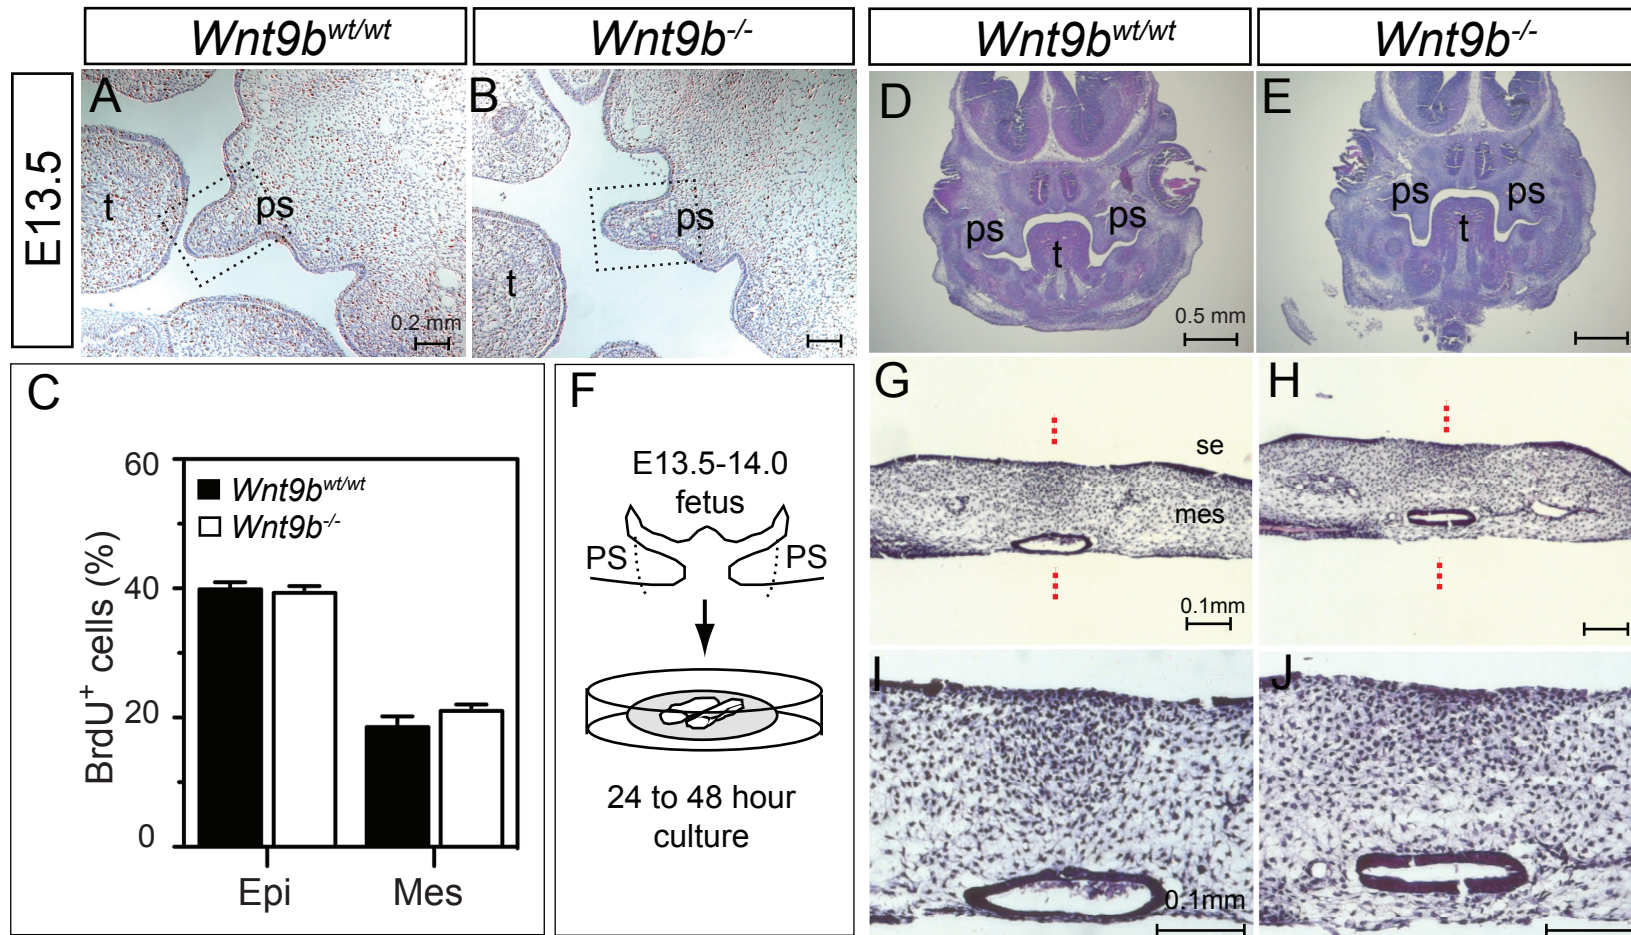

Supplement: supp_dev.075796_DEV075796FigS1.pdf [file supp_dev.075796_DEV075796FigS1.pdf]

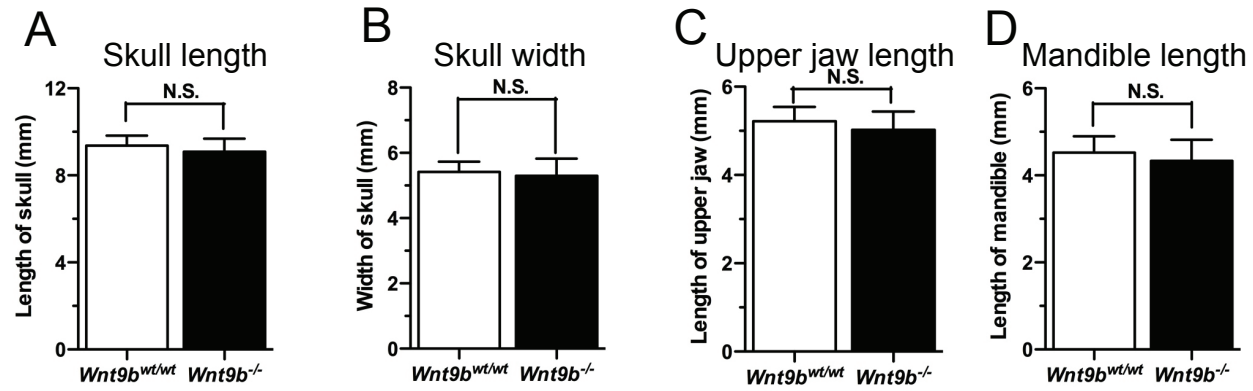

Supplement: supp_dev.075796_DEV075796FigS2.pdf [file supp_dev.075796_DEV075796FigS2.pdf]

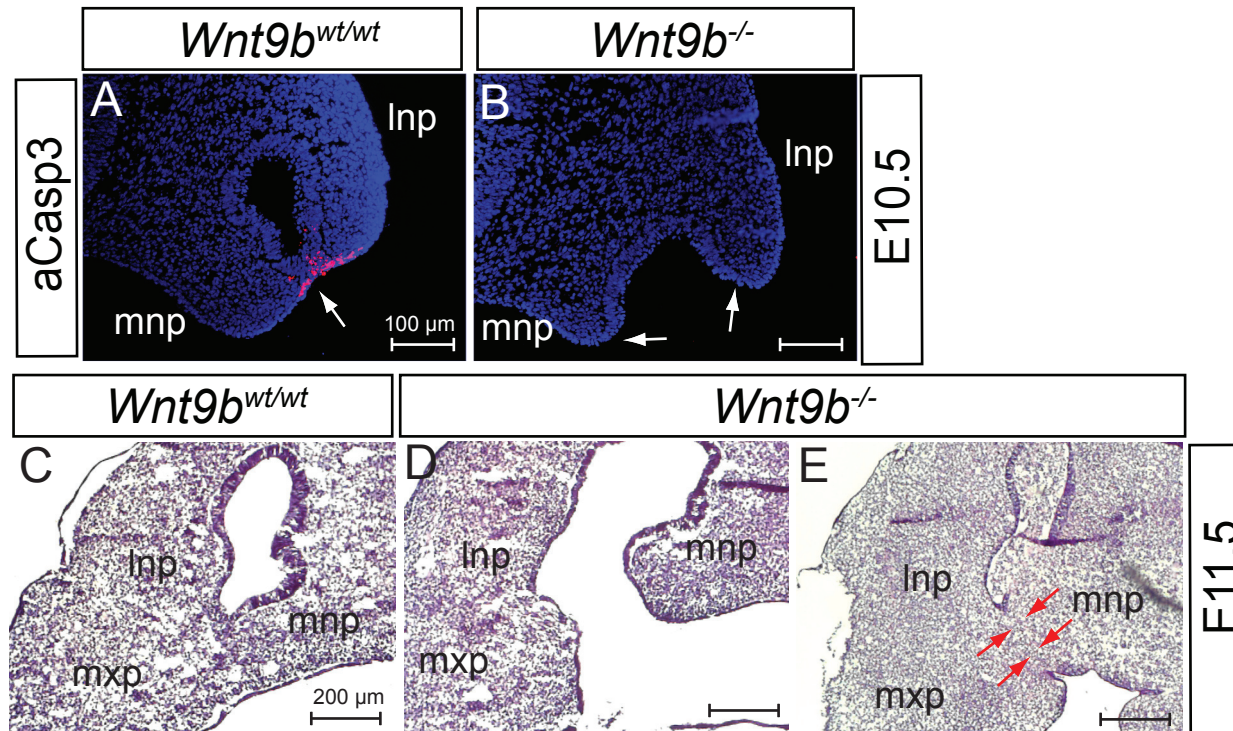

Supplement: supp_dev.075796_DEV075796FigS3.pdf [file supp_dev.075796_DEV075796FigS3.pdf]

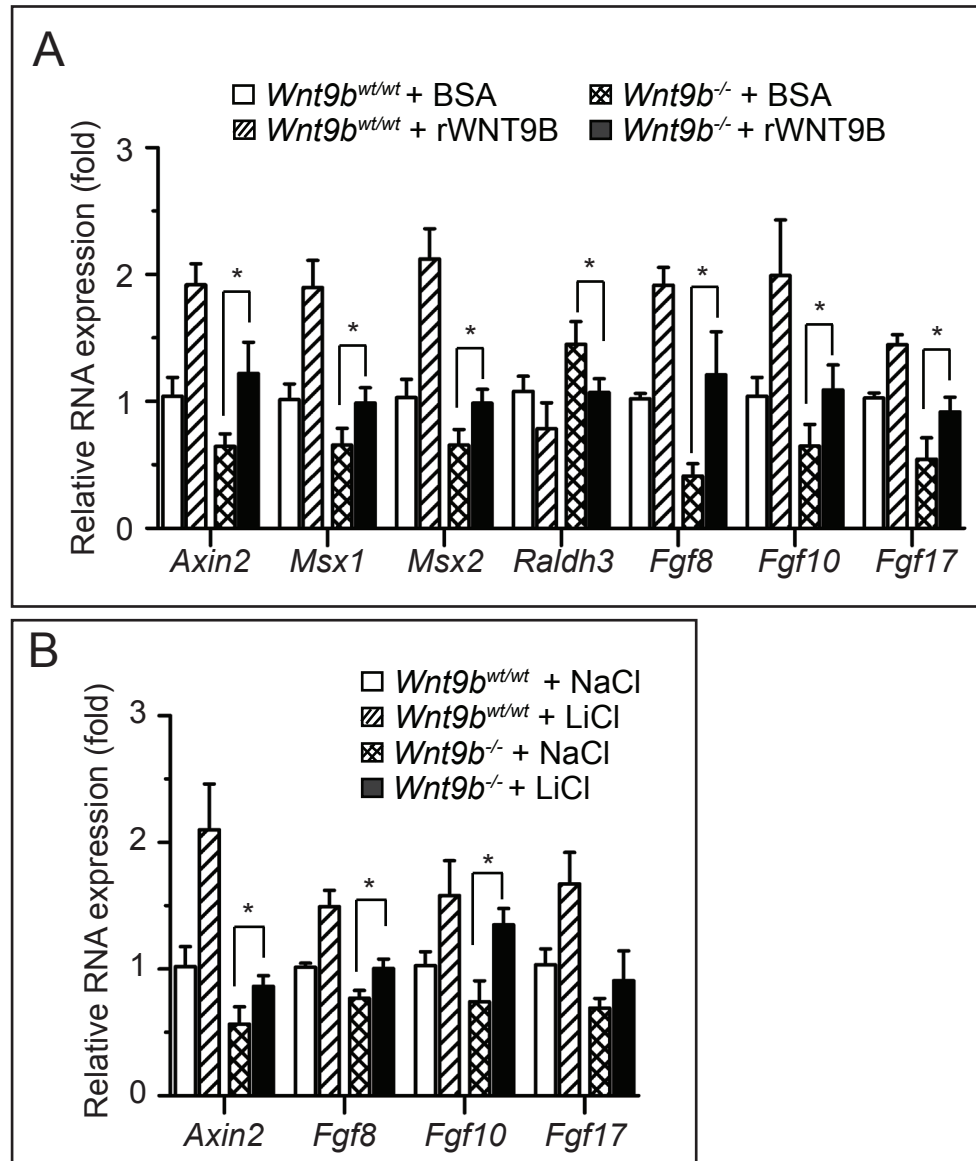

Supplement: supp_dev.075796_DEV075796FigS4.pdf [file supp_dev.075796_DEV075796FigS4.pdf]

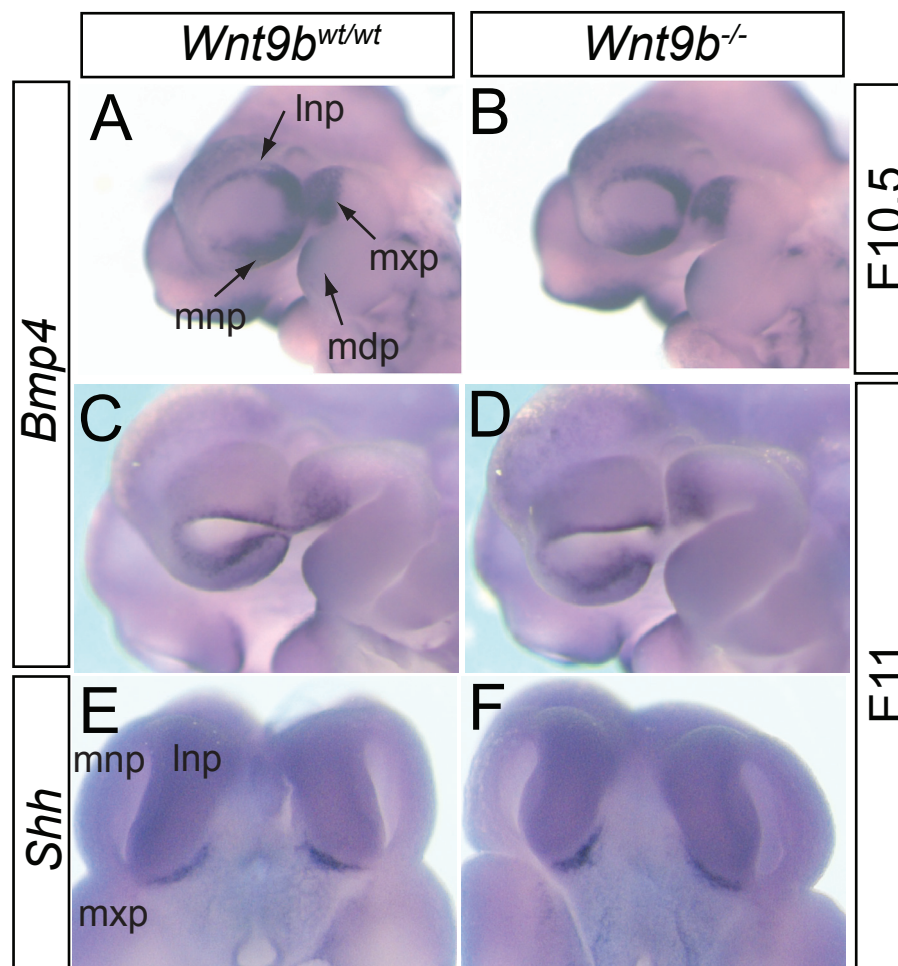

Supplement: supp_dev.075796_DEV075796FigS5.pdf [file supp_dev.075796_DEV075796FigS5.pdf]

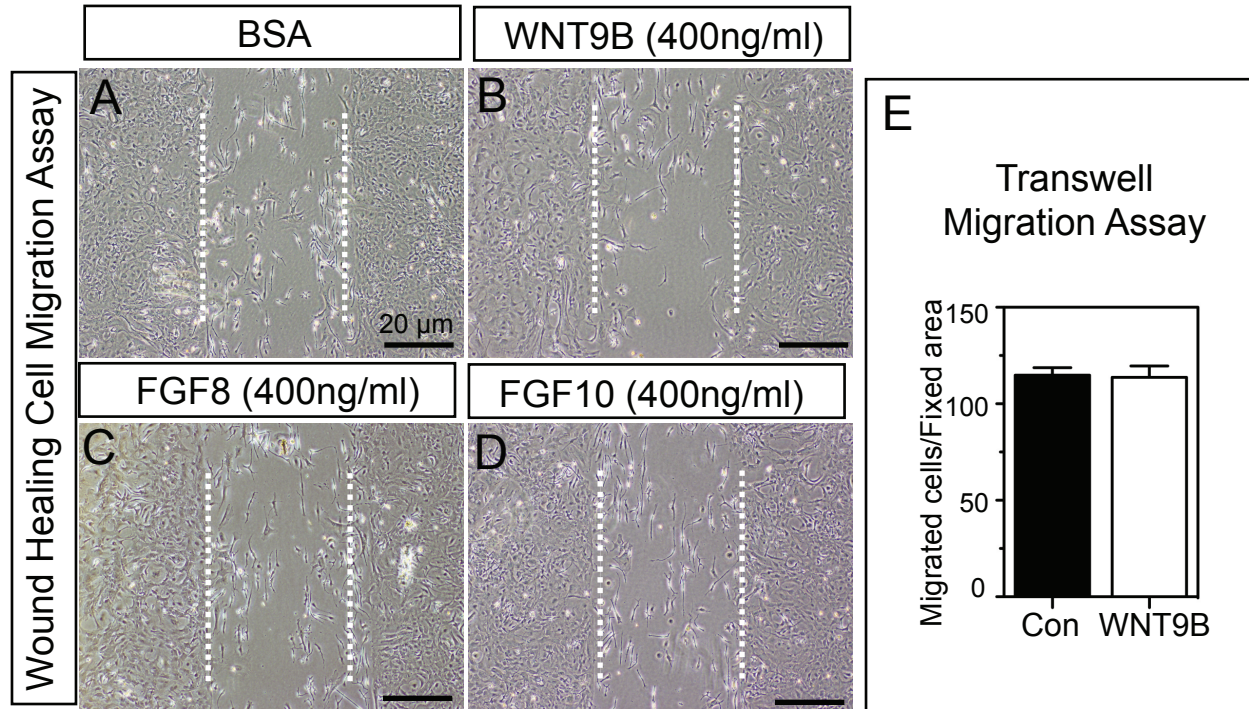

Supplement: supp_dev.075796_DEV075796FigS6.pdf [file supp_dev.075796_DEV075796FigS6.pdf]
